# Supplementary material
Source: Springer Nature journal article supplement (https://www.springermedizin.de/resource/supplementary/13550_2013_158_MOESM7_ESM.pdf/9687720)

**A**  $^{99m}\text{Tc}$ -Ch-DTPA measurement in different parts of GI Tract

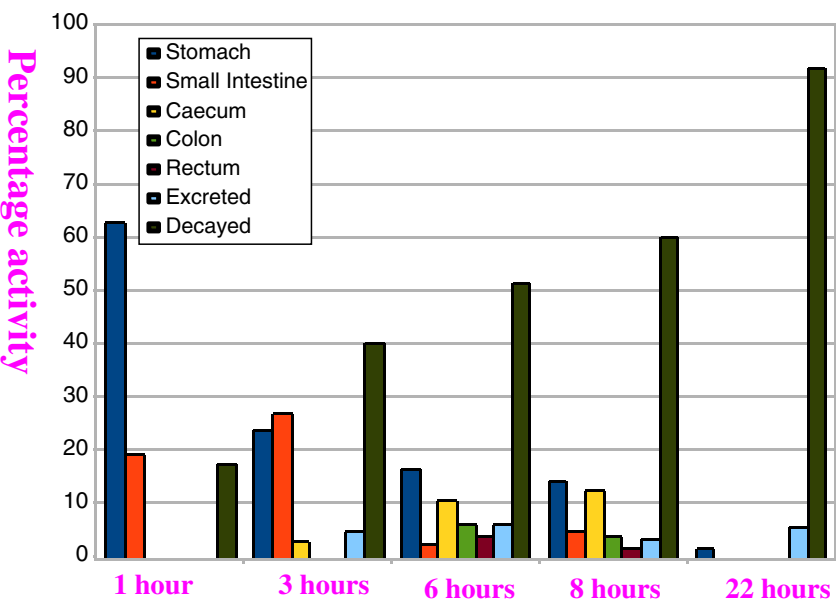

**B**  $^{99m}\text{Tc}$ -Ch-DTPA measurement in different parts of GI Tract after loperamide treatment

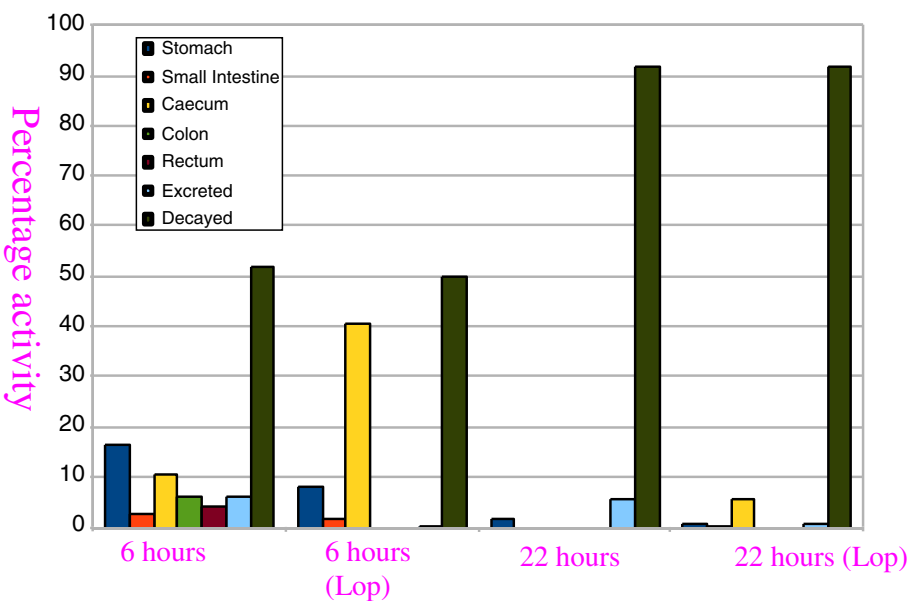

Supplement: MOESM7 [file 9687720]
